# Supplementary material for: Navigating the Complexities of Traumatic Encephalopathy Syndrome (TES): Current State and Future Challenges
Source: Preprints.org preprint supplement (doi:10.20944/preprints202310.1603.v1), 2023-10-25
Supplement: Supplementary file 1 [file supplementary]

| TBI Pharmacological Regimen | Proposed Mechanism |
| --- | --- |
| Cholinesterase Inhibitors | Cholinesterase inhibitors including galantamine, donepezil, and rivastigmine, have been repurposed for TBI patients1. |
| NMDA receptor antagonists | NMDA receptor antagonist, amantadine, has been shown to improve cognition in moderate to severe TBI patients2. |
| SSRIs | Selective serotonin reuptake inhibitors (SSRIs) like sertraline and escitalopram have been utilized to mange behavioral symptoms in TBI patients3. |
| Guanfacine | Guanfacine has been reported to improve working memory deficits in mild TBI patients4. |
| Nutraceuticals | A number of nutraceuticals have been utilized in treatment of TBI preclinical and clinical studies, including N-acetylcysteine (NAC), flavonoids, resveratrol, alpha-tocopherol (vitamin E), coenzyme Q105. |
| NSAIDs | COX-2 selective drugs like carprofen, celecoxib, meloxicam, nimesulide, and rofecoxib have undergone testing in various preclinical TBI models, with no significant degree of established efficacy6. |
| Glucocorticoids | Despite several promising preclinical studies, clinical trials have resulted in limited success, likely due to a narrow therapeutic window7. |
| Phosphodiesterase Inhibitors | Phophodiesterase inhibitors have been utilized mostly in preclinical studies, and have not systematically studied in clinical trial setting8. |
| Minocycline | In prior preclinical studies, minocycline given between 5 min and 1 h after injury improved performance on a variety of neurobehavioral9. |
| Progesterone | A large, multi-center Phase III PROtect III trial, , as well as a second larger scale trial (SYNAPSE) examined progesterone did not establish clinical effiacy10. |
| Erythropoietin | Despite preclinical studies success, the evidence for the use of erythropoietin has not reached the threshold for its use in a phase III trial6. |
| Anakinra | A small phase II randomized controlled clinical trial reported anti-inflammatory benefits in Anakinra treated group, but the study size was too small to establish efficacy, but provided an intriguing potential future approach11. |
| Tau phosphorylation targets | The studies focusing on tau-phosphorylation targets have been mostly preclinical, with possible future clinical applications12. |
| Tau acetylation targets | Tau acetylation inhibitors including salsalate, as well as methylene blue, as well as histone deacetylase 6 and sirtuins have largely been examined in the preclinical setting13. |
| Immunotherapy | Specific antibodies targeting the pathogenic cis-P-tau post TBI have been reported to lead to improved structural and functional outcomes14, but yet to be examine in larger clinical trial setting. |

1 Pierre, K. *et al.* Chronic traumatic encephalopathy: update on current clinical diagnosis and management. *Biomedicines* **9**, 415 (2021).

2 Mohamed, M. S., El Sayed, I., Zaki, A. & Abdelmonem, S. Assessment of the effect of amantadine in patients with traumatic brain injury: A meta-analysis. *Journal of Trauma and Acute Care Surgery* **92**, 605-614 (2022).

3 Silverberg, N. D. & Panenka, W. J. Antidepressants for depression after concussion and traumatic brain injury are still best practice. *BMC psychiatry* **19**, 1-3 (2019).

4 McAllister, T. W. *et al.* Alpha-2 adrenergic challenge with guanfacine one month after mild traumatic brain injury: altered working memory and BOLD response. *Int J Psychophysiol* **82**, 107-114 (2011). <https://doi.org:10.1016/j.ijpsycho.2011.06.022>

5 Fesharaki-Zadeh, A. Oxidative Stress in Traumatic Brain Injury. *Int J Mol Sci* **23** (2022). <https://doi.org:10.3390/ijms232113000>

6 Bergold, P. J. Treatment of traumatic brain injury with anti-inflammatory drugs. *Experimental neurology* **275**, 367-380 (2016).

7 Roberts, I. *et al.* Effect of intravenous corticosteroids on death within 14 days in 10008 adults with clinically significant head injury (MRC CRASH trial): randomised placebo-controlled trial. *Lancet* **364**, 1321-1328 (2004). <https://doi.org:10.1016/s0140-6736(04)17188-2>

8 Atkins, C. *et al.* Postinjury treatment with rolipram increases hemorrhage after traumatic brain injury. *Journal of neuroscience research* **90**, 1861-1871 (2012).

9 Haber, M. *et al.* Minocycline plus N-acetylcysteine synergize to modulate inflammation and prevent cognitive and memory deficits in a rat model of mild traumatic brain injury. *Experimental neurology* **249**, 169-177 (2013).

10 Skolnick, B. E. *et al.* A clinical trial of progesterone for severe traumatic brain injury. *New England Journal of Medicine* **371**, 2467-2476 (2014).

11 Helmy, A. *et al.* Recombinant human interleukin-1 receptor antagonist in severe traumatic brain injury: a phase II randomized control trial. *Journal of Cerebral Blood Flow & Metabolism* **34**, 845-851 (2014).

12 Tang, S. J. *et al.* Fyn kinase inhibition reduces protein aggregation, increases synapse density and improves memory in transgenic and traumatic Tauopathy. *Acta Neuropathologica Communications* **8**, 96 (2020). <https://doi.org:10.1186/s40478-020-00976-9>

13 Cohen, T. J. *et al.* The acetylation of tau inhibits its function and promotes pathological tau aggregation. *Nat Commun* **2**, 252 (2011). <https://doi.org:10.1038/ncomms1255>

14 Kondo, A. *et al.* Antibody against early driver of neurodegeneration cis P-tau blocks brain injury and tauopathy. *Nature* **523**, 431-436 (2015).
